# Supplementary figures and images for: A minimal constraint device for imaging nuclei in live Drosophila contractile larval muscles reveals novel nuclear mechanical dynamics
Source: Royal Society of Chemistry journal article supplement (doi:10.1039/d0lc00214c), 2020-01-01

Lorber et al., Figure S2

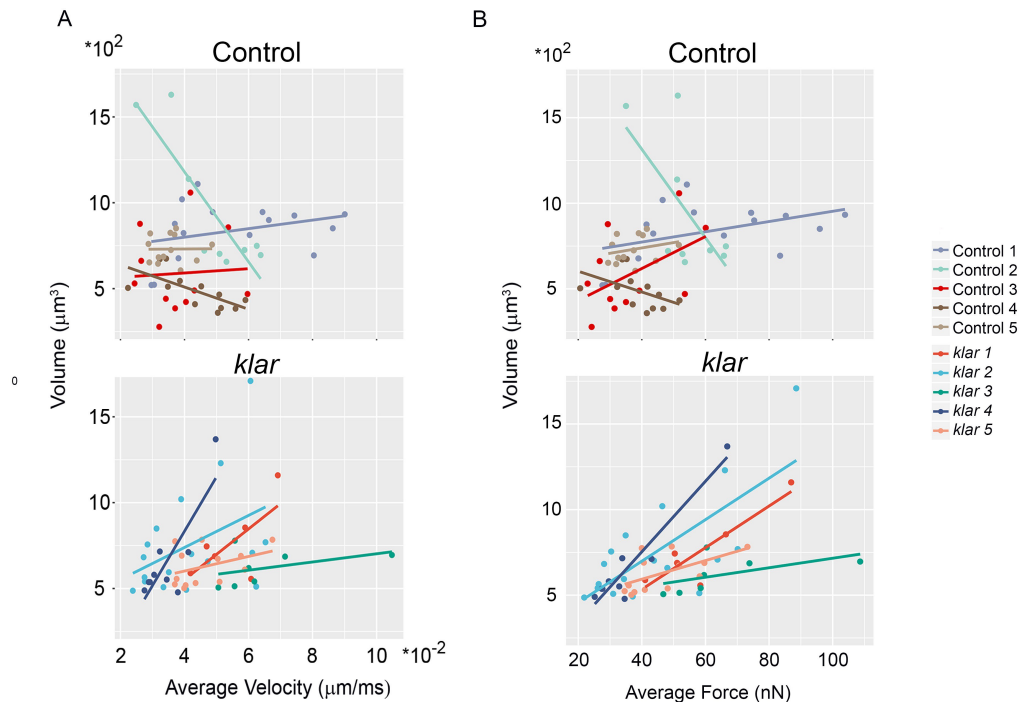

Supplement: d0lc00214c2.pdf [file d0lc00214c2.pdf]
